# Supplementary material
Source: Research Square preprint supplement (doi:10.21203/rs.3.rs-9151609/v1)
Supplement: Supplementary file 1 [file d25a8d39164ce9bf509f177f.docx]

**Supporting Information:**

**Drop Cultivation of the Hyperthermophilic Archaeon *S. islandicus* and its associated lytic virus SIRV:**

Microfluidic cultivation of single microbes has been demonstrated for bacteria and yeast and applied to diverse microbiomes.1–4 Here, we extend these methods to single archaeal hosts as well as their viruses. To achieve this goal, we first needed to identify suitable incubation conditions in droplets that replicate the high temperature and low pH needed to facilitate the growth of *S. islandicus* cells.5 Single cells in their aqueous growth media are encapsulated to form a monodisperse water-in-oil emulsion using a PDMS-based microfluidic device.6 For this application, the aqueous drops are dispersed in a fluorinated oil and stabilized by a biocompatible fluorosurfactant.7,8 Fluorinated phases have desirable properties as a carrier fluid as they effectively exclude both hydrophilic and hydrophobic components while limiting transport between drops and maintaining oxygen permeability.9 In principle, this allows each drop compartment to function as an individual culture vessel in a highly parallelized manner.

We fabricated a dropmaking device for use in archaeal culture experiments using standard photolithography techniques.10 The device, which is shown in Figure 1A, features a simple planar design with two aqueous inlets and a 50 µm square cross-section at the junction and can form monodisperse water-in-oil drops ranging from ~100 pL to ~5 nL. The flow rates and compositions of the two aqueous phases can be adjusted to yield the desired mix of hosts, viruses, and media. However, cultivating hyperthermophiles in drops presented several unique challenges compared to previously described microbial culture in drops.2 For *S. islandicus*, the optimal growth temperature is 76 °C, and the growth rate is slow with a doubling time of ~8-10 hours.11 This necessitates long incubations at high temperature, which places increased strain on the emulsion, resulting in the loss of monodispersity (Figure S1). We found that the drop stability could be maintained when the emulsion is supplemented with extra surfactant and transferred to the wells of a 96-well plate such that each well is two-thirds full. The plate is then sealed with foil and double bagged with damp cloths to further reduce evaporation during incubation. As shown in Figure 1B-C, drop stability could be maintained for up to two weeks, which is sufficient for the growth of *S. islandicus*.

With a working incubation condition, we realized that the emulsion recovery step was impacting our ability to assess *S. islandicus* growth in drops. Typically, the aqueous contents of an emulsion are recovered using chemical de-emulsification with perfluoro-octanol, which has been shown to have minimal impact on cell viability for several bacterial species and yeast.1,6,12 However, when applied to *S. islandicus*, we observed a rapid loss of ~32% of viable cell counts (Figure S2A-B). We also tried de-emulsification using 5% perfluoro-butanol, a stronger de-emulsifier, which caused almost complete loss of cell viability (not shown). To avoid this issue, we adapted a previously described method of electrostatic coalescence, which was originally developed to eliminate downstream PCR inhibition caused by residual de-emulsifier.13 We found that the larger emulsion volumes needed for parallel culture (up to 10 mL) could be tractably coalesced and recovered using the same principle by replacing the handheld static gun with a workspace de-ionizer (Figure S2C-D). Importantly, this electrostatic approach did not negatively impact cell counts or viability for *S. islandicus* as measured by live-dead staining with flow cytometry. With a working condition for incubation and recovery, we varied the drop size to obtain comparable growth to standard bulk cultures. We found that >0.5 nL droplets were suitable to grow single *S. islandicus* cells, achieving an approximate 10-hour doubling time, which is reasonably close to the 8-hour doubling observed in bulk (Figure S2E).

After confirming cell growth in drops, we extended the drop culture platform to archaeal viruses. When enriching viruses, the growth media is supplemented with a density of host cells while viruses are introduced from the second aqueous inlet, as shown in Figure 1A. This configuration ensures that viral attachment does not occur before encapsulation, and each cell and virus is loaded independently following a Poisson distribution defined by the average occupancy (λ) of each component.14,15 For cells, each drop should contain a density of hosts on which a single virus can replicate, but not too many hosts such that growth is suppressed. To meet these criteria, we chose to inoculate the drops at an initial host OD600 of ~0.002. In this configuration, each ~1 nL drop will contain 10-11 cells on average, and more than 95% of drops will contain between 5 and 17 clonal host cells. This ensures that all drops will have sufficient resources to replicate each virus. To ensure the host CRISPR-Cas system would not interfere with infection, we knocked out *cas6,* which is essential to CRISPR-immune function in the RJW004 background,17 derived from M.16.4.18 To ensure SIRVs are loaded into their own droplets, λ for the virus must be much less than one such that most drops contain zero viruses and a small fraction are occupied by a virus.19 Generally, λ is kept at or below 0.2 to maintain >90% single virus occupancy while maximizing occupancy. Specifically, at λ=0.2; 81.8% of drops are empty, 16.4% have a single virus, and the remaining 1.7% have two or more viruses. As such, viral occupancy is maintained below 0.2 during all enrichments, using the PFU titer.


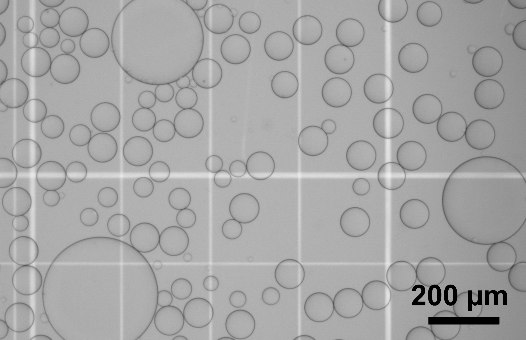


Extended Figure1: Example image showing loss of drop monodispersity. Larger drops form due to merging. Smaller drops result from sample evaporation.


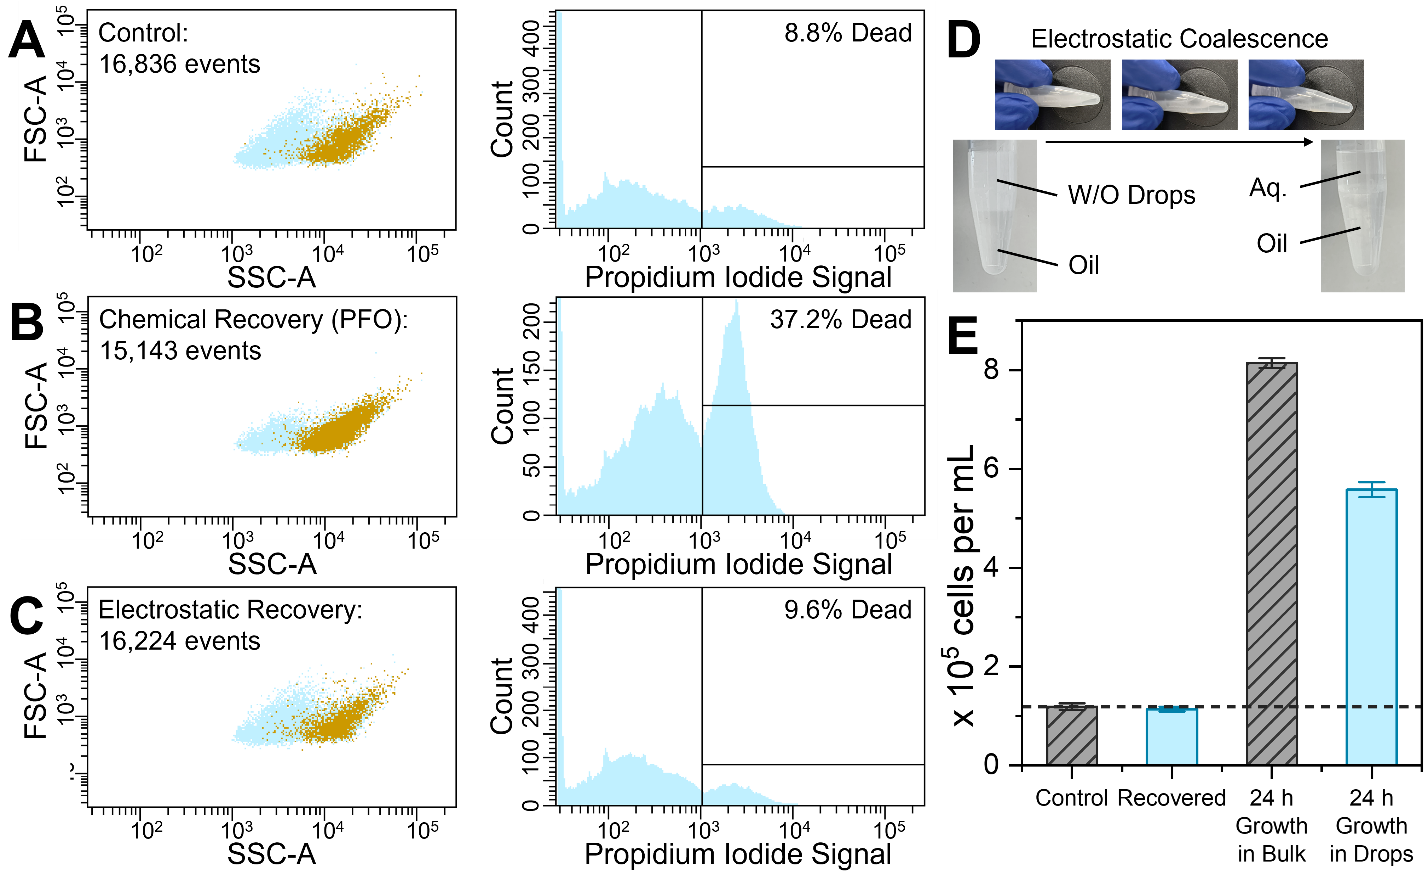


Figure S1: Flow cytometry data for cell counting and viability. *S. islandicus* cells were grown to stationary phase and diluted into media before drop generation. A) No treatment control. B) Aqueous phase recovered by addition of 20% perfluoro-octanol in HFE. C) Aqueous phase recovered by electrostatic coalescence. D) A 1.5 mL tube containing a water-in-oil (W/O) emulsion. Rotation of the tube at the tip of a workspace deionizer results in electro-coalescence, leaving a clear aqueous layer on top. E) Flow cytometry cell counts to validate recovery and growth in droplets. Measurements are the average of three replicates.


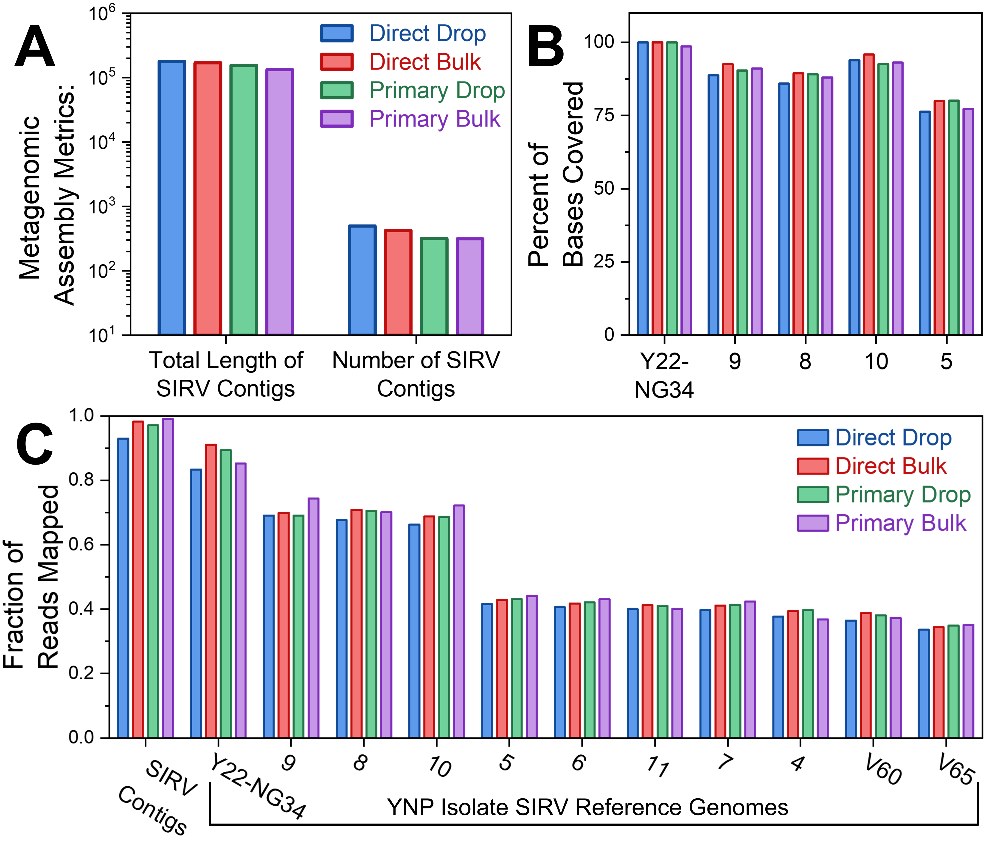


Figure S2: A) Metagenomic assembly metrics for each sample. SIRV structural variants contribute to increased total length of SIRV contigs and more unique SIRV contigs. B) Percent of bases covered for each of the top 5 reference genomes by metagenome. The local SIRV-Y22-NG34 genome is nearly completely covered by all metagenomes. C) Fraction of reads mapped across YNP SIRV reference genomes for each enriched SIRV metagenome. SIRV-Y22-NG34 provides the best reference for each metagenome among known SIRV isolates.


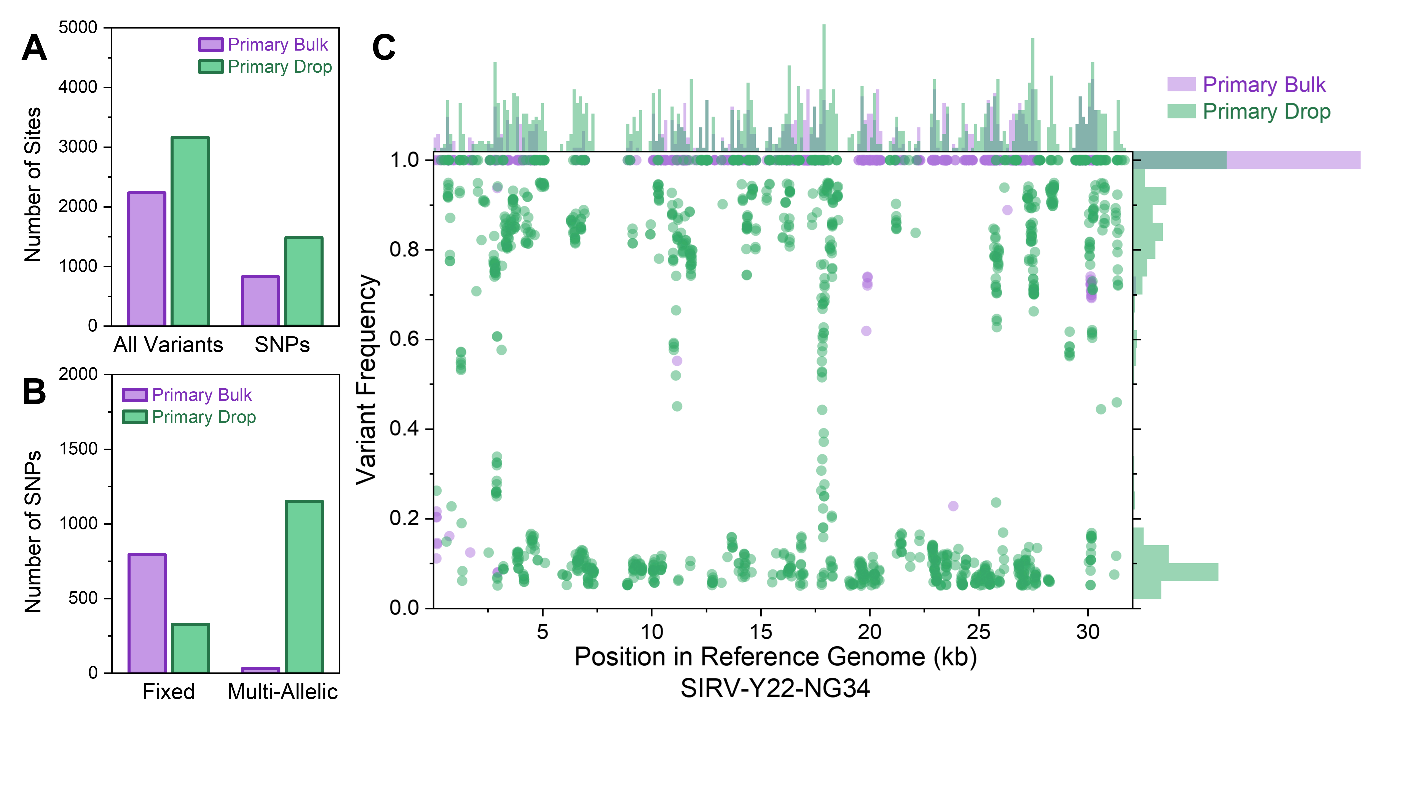


Figure S3: Comparison of SIRV variants identified from bulk and drop enrichments of the viral primary culture. A) Total number of variant sites identified by Breseq analysis. All variants consist of SNPs, single base insertions and deletions, larger indels, and junction candidates. B) Total number of SNPs (including single-base indels) that are fixed in the population or multi-allelic at a threshold of 5%. C) Distribution of variants plotted across the SIRV reference genome and across frequencies. The variants identified from the drop enrichment are distributed more broadly across the genome. The drop enrichment also preserved more minor variants, resulting in more total SNPs, including more multi-allelic sites.


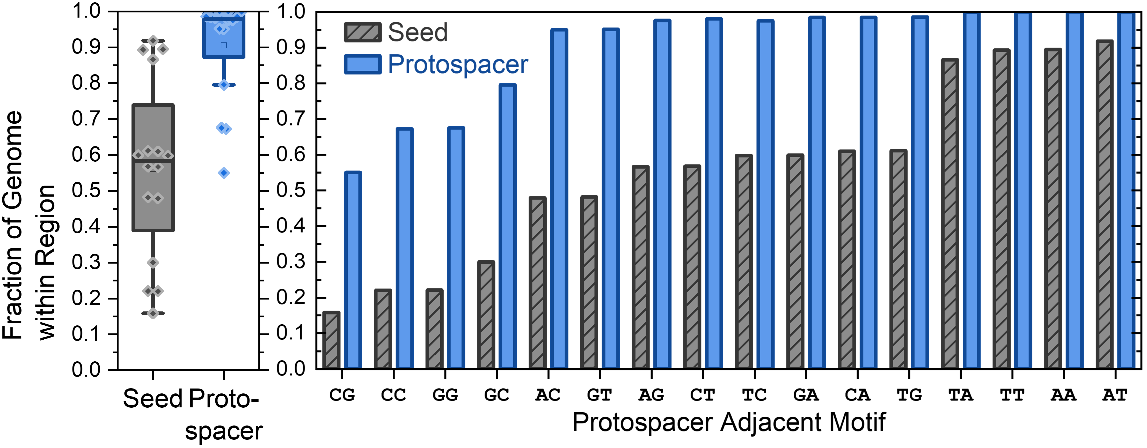


Figure S4: Genome coverage of hypothetical seed and hypothetical protospacer matched regions formed by extending 8 nt or 40 nt downstream of each XXN alignment. Due to the low GC content of SIRV genomes, various AT-rich motifs result in near-complete genome coverage.


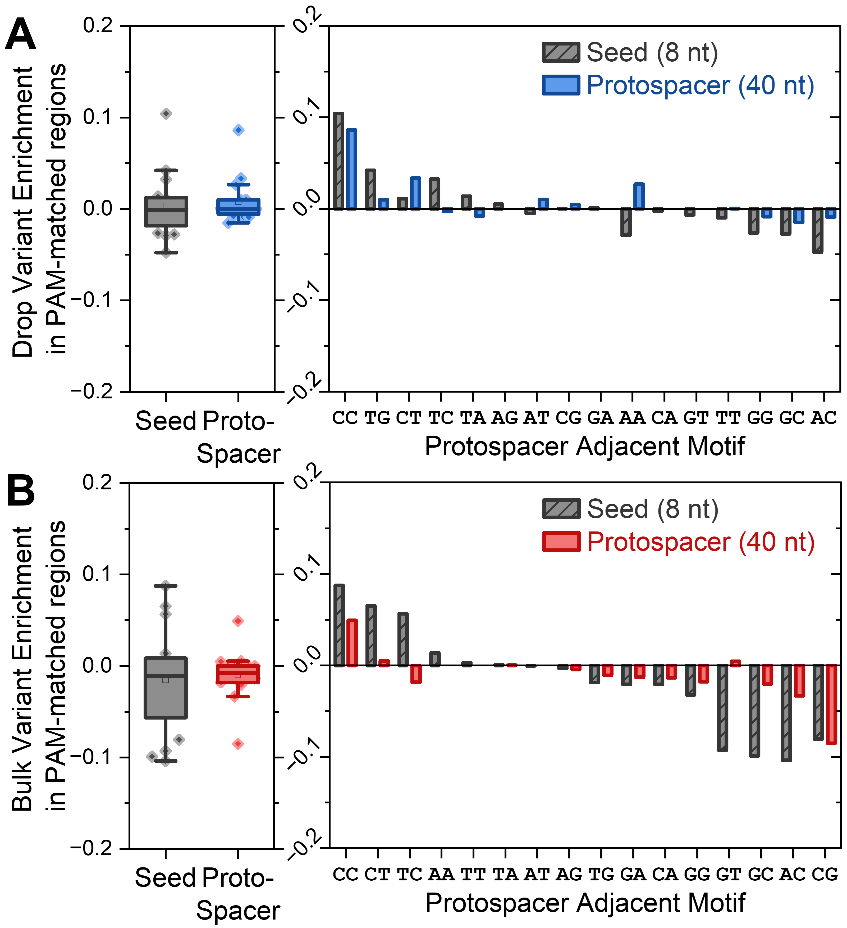


Figure S5: A) Hypothetical protospacer match analysis of all XXN motifs using variants identified from (A) drop enrichment and (B) bulk enrichment. Variants from both direct and primary enrichment are combined and deduplicated for drop and bulk separately.

Supplementary Table 1: SIRV Variable Genes not found in SIRV-Y22-NG34 by Metagenome

| Sample Name | Closest Homolog | Source Accession | AA Sequence |
| --- | --- | --- | --- |
| Direct Drop | SIRV_10 gp01 | NC_034625 | MNTQKEVEQKIGQILYKARQEGEAYLTTLSPEQLKKSGFEESEEFFNFEFVKIYILYDDQFKLKYQFNGDPSNVLYESKEDIGGLKEFIEVVKKYLEVSE |
| Direct Drop | SIRV_10 gp02 | NC_034625 | MNIVLRELDKEKFNINITAWLDIDNDIQSCYTTFKEITIVTIIQMISDIVERDGWDLQYFEKGEEEKLFNAFMKNSKITVRLNKKIDELNYVFEEAIVEFDFPESEKKKIAELYLNNILNNLYYFDECIIYNLDEGDINLIPEVLSDEVYQLLSPDEIKGKFKEKIEKINTEKV |
| Direct Drop | SIRV_9 gp01 | NC_034620 | MKHLTDERISELIKQAIQEGKNDSRYYLIIKEYKGRDGHVKIRQVYGEYEMILMNINDVDDNTREFEYAVIPKSDTVILLVEERIKYNSQSQKHQIVYVFNFFTGWKSLSLY |
| Direct Drop | SIRV_5 gp54 | NC_034621 | MRCENMNLNTSIDPIWLLVIAGIFYESLFIFFLLELRQIMKRIEEEELVRMLKKKYGG |
| Direct Bulk | SIRV_9 gp01 | NC_034620 | MKHLTDERISELIKQAIQEGKNDSRYYLIIKEYKGRDGHVKIRQVYGEYEMILMNINDVDDNTREFEYAVIPKSDTVILLVEERIKYNSQSQKHQIVYVFNFFTGWKSLSLY |
| Direct Bulk | SIRV_9 gp35 | NC_034620 | MIIKKKKDWNIEPCNLNKKLWYGEPYDLHEGFYIPCKTDKKIDKKKILKILT |
| Primary Drop | SIRV_8 gp55 | NC_034623 | MKKIIKHLTTHKLRLKNDNLKAIEKLEKNNYFFLILVNFIFPRSWMRN |
| Primary Drop | SIRV_4 gp45 | NC_034628 | MAEQSERIVLKDLDLDKFSENISESLREDNIAESCYTNFQDAVVETIGQTISTILEKDGWKIKRFDELTMFNEKDSEKLFNAFMKNSEFIITLKKKVDEQKYEFKEVIIKFDFPEEEKKRIAEEYIANILVGLYYLDICIFVDLEEINVDKISEALSNEVYGLLNPEEIKIKFKDAIEEAINILKYDDNEEEE |
| Primary Drop | SIRV_11 gp42 | NC_034624 | MRKIYANVKQIRVSTSIPQNANLLWQNDKLALYYTYDSKEGRVDWIMQNNTNSSILVSLLRGAILNINNQTYTIPNYLFGNAFAEVYFANGLSNFITDLNNIPLYSLAIINNNDGVRTIAFVFQIPANSVIIAPEYGFNGLQNIDGQLLEANPINQNLFGIIYDFSEIIEYEYQTGINVNYPPDPYIVQSYQFLVGNLGQIMTQRLILEIPESDINTVKSLVSDFQKVIDKLKKIF |
| Primary Bulk | SIRV_9 gp01 | NC_034620 | MKHLADERISELIKQAIQEGKNDSRYYLIIKEYKGRDGHVKIRQVYGEYEMILMNINDVDDNTREFEYAVIPKSDTVILLVEERIKYNSQSQKHQIVYVFNFFTGWKSLSLY |

Supplementary Table 2: Tabel of genes lacking variant data from drop or bulk enrichments needed to calculate dN/dS.

| Genes with insufficient variants in drop samples to calculate dN/dS | Genes with insufficient variants in bulk samples to calculate dN/dS |
| --- | --- |
| gp01 | gp01 |
| gp02 | gp02 |
| gp09 | gp09 |
|  | gp13 |
| gp14 | gp14 |
|  | gp15 |
| gp16 | gp16 |
|  | gp17 |
|  | gp18 |
|  | gp20 |
| gp22 | gp22 |
|  | gp31 |
|  | gp33 |
|  | gp43 |

Supplementary Table 3: Difference in SIRV variants recovered from drop enrichment and bulk enrichments.

| Gene ID | Direct Drop Variants | Direct Bulk Variants | Difference per Kb of Gene |
| --- | --- | --- | --- |
| gp01 | 0 | 0 | 0.00 |
| gp02 | 0 | 0 | 0.00 |
| gp03 | 10 | 8 | 4.22 |
| gp04 | 1 | 6 | -20.08 |
| gp05 | 15 | 15 | 0.00 |
| gp06 | 18 | 18 | 0.00 |
| gp07 | 56 | 41 | 24.04 |
| gp08 | 74 | 54 | 15.29 |
| gp09 | 40 | 0 | 96.62 |
| gp10 | 25 | 6 | 69.60 |
| gp11 | 31 | 15 | 46.38 |
| gp12 | 23 | 3 | 69.44 |
| gp13 | 0 | 0 | 0.00 |
| gp14 | 0 | 0 | 0.00 |
| gp15 | 3 | 0 | 12.35 |
| gp16 | 0 | 0 | 0.00 |
| gp17 | 5 | 0 | 31.45 |
| gp18 | 2 | 0 | 6.41 |
| gp19 | 25 | 6 | 46.91 |
| gp20 | 10 | 0 | 42.74 |
| gp21 | 74 | 24 | 48.45 |
| gp22 | 0 | 0 | 0.00 |
| gp23 | 22 | 22 | 0.00 |
| gp24 | 7 | 7 | 0.00 |
| gp25 | 25 | 18 | 30.70 |
| gp26 | 33 | 25 | 21.68 |
| gp27 | 75 | 26 | 34.39 |
| gp28 | 28 | 15 | 25.05 |
| gp29 | 26 | 16 | 35.46 |
| gp30 | 37 | 24 | 33.85 |
| gp31 | 5 | 4 | 4.76 |
| gp32 | 318 | 210 | 33.90 |
| gp33 | 0 | 0 | 0.00 |
| gp34 | 129 | 11 | 67.93 |
| gp35 | 26 | 12 | 9.03 |
| gp36 | 62 | 2 | 124.22 |
| gp37 | 35 | 2 | 35.71 |
| gp38 | 31 | 18 | 21.45 |
| gp39 | 145 | 41 | 97.65 |
| gp40 | 23 | 5 | 34.29 |
| gp41 | 141 | 64 | 64.65 |
| gp42 | 62 | 39 | 25.47 |
| gp43 | 9 | 2 | 12.41 |
| gp44 | 56 | 52 | 5.44 |
| gp45 | 32 | 41 | -27.52 |
